# Supplementary material for: High-performance self-powered perovskite photodetector with a rapid photoconductive response
Source: Royal Society of Chemistry journal article supplement (doi:10.1039/c6ra18453g), 2016-01-01
Supplement: c6ra18453g1.pdf [file c6ra18453g1.pdf]

## Supplementary Information

### High-Performance, Self Powered and Fast Photoconductive Response

#### Perovskite Photodetector

Kavita Pandey<sup>1</sup>, Mihir Chauhan<sup>1</sup>, Vishwa Bhatt<sup>1</sup>, Brijesh Tripathi<sup>1</sup>, Pankaj Yadav<sup>1\*</sup>, Manoj Kumar<sup>1\*</sup>

<sup>1</sup>School of Technology, Pandit Deendayal Petroleum University, Gandhinagar – 382007, India

\*Corresponding author: [manoj.kspv@gmail.com](mailto:manoj.kspv@gmail.com), [pankajphd11@gmail.com](mailto:pankajphd11@gmail.com)

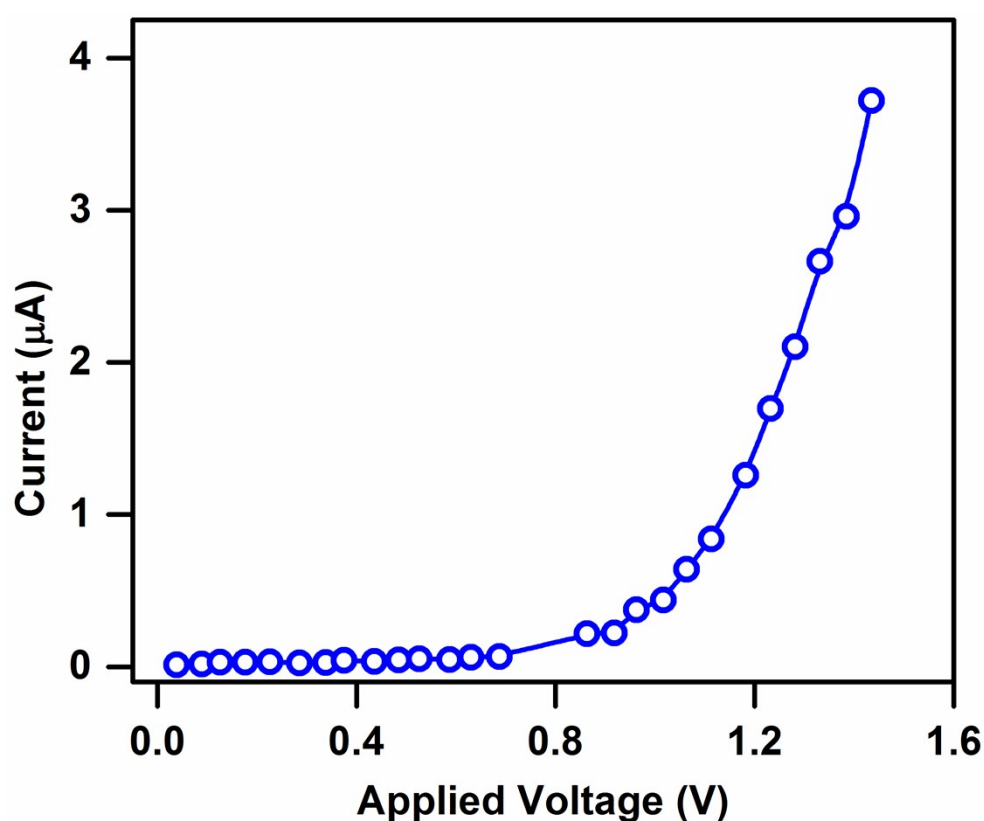

Figure S1: Voltage dependent net terminal current under the dark condition.
